# Supplementary material for: Behaviour of polysulfone ultrafiltration membrane for dyes removal
Source: Oxford University Press journal article supplement (doi:10.2166/wst.2018.124), 2018-03-17
Supplement: wst2018124supp.docx [file wst2018124supp.docx]

**Supplementary material**

**Table 2.** Different combination used

|  | Permeate  Jp | Rejection  coefficient  R (%) | 1/Jp | 1/R | Jp*R | Jp/R | R/Jp |
| --- | --- | --- | --- | --- | --- | --- | --- |
| Permeate. Jp |  | ~~1~~ | ~~2~~ | ~~3~~ | ~~4~~ | ~~5~~ | ~~6~~ |
| Rejection coefficient  R (%) | 1 |  | ~~7~~ | ~~8~~ | ~~9~~ | ~~10~~ | ~~11~~ |
| 1/Jp | ~~2~~ | 7 |  | ~~12~~ | ~~13~~ | ~~14~~ | ~~15~~ |
| 1/R | 3 | ~~8~~ | 12 |  | ~~16~~ | ~~17~~ | ~~18~~ |
| Jp*R | 4 | 9 | 13 | 16 |  | ~~19~~ | ~~20~~ |
| Jp/R | 5 | 10 | 14 | 17 | 19 |  | ~~21~~ |
| R/Jp | 6 | 11 | 15 | 18 | 20 | 21 |  |

**Table 3.** Correlation of different combinations obtained.

| **Combination** | **a** | **b** | **R2** |
| --- | --- | --- | --- |
| **1** | -2375.6 | 39.307 | 0.6478 |
| **3** | 6.8683 | 0.0081 | 0.541 |
| **4** | 1.365 | 0.1239 | 0.024 |
| **5** | 0.1193 | -0.0004 | 0.8034 |
| **6** | -764306 | 9762.9 | 0.6248 |
| **7** | 5.8949 | 29.644 | 0.8714 |
| **9** | 0.0011 | 0.1139 | 0.1272 |
| **10** | -4E-05 | 0.0014 | 0.7155 |
| **11** | 319.35 | -2836.2 | 0.9503 |
| **12** | -0.0004 | 0.1216 | 0.609 |
| **13** | 1E-05 | 0.1332 | 0.0007 |
| **14** | -6E-06 | 0.0015 | 0.7309 |
| **15** | 49.201 | -3711.3 | 0.8995 |
| **16** | -0.4953 | 0.1669 | 0.2753 |
| **17** | 0.0135 | -0.0003 | 0.8959 |
| **18** | -78160 | 8535.4 | 0.5698 |
| **19** | -0.0036 | 0.0011 | 0.0572 |
| **20** | 23960 | 281.9 | 0.0477 |
| **21** | -5E+06 | 6830.4 | 0.57 |
